# Supplementary material for: Endoplasmic Reticulum Stress in Colonic Mucosa of Ulcerative Colitis Patients Is Mediated by PERK and IRE1 Pathway Activation
Source: Hindawi journal article supplement (doi:10.1155/2022/6049500), 2022-02-09

**A**

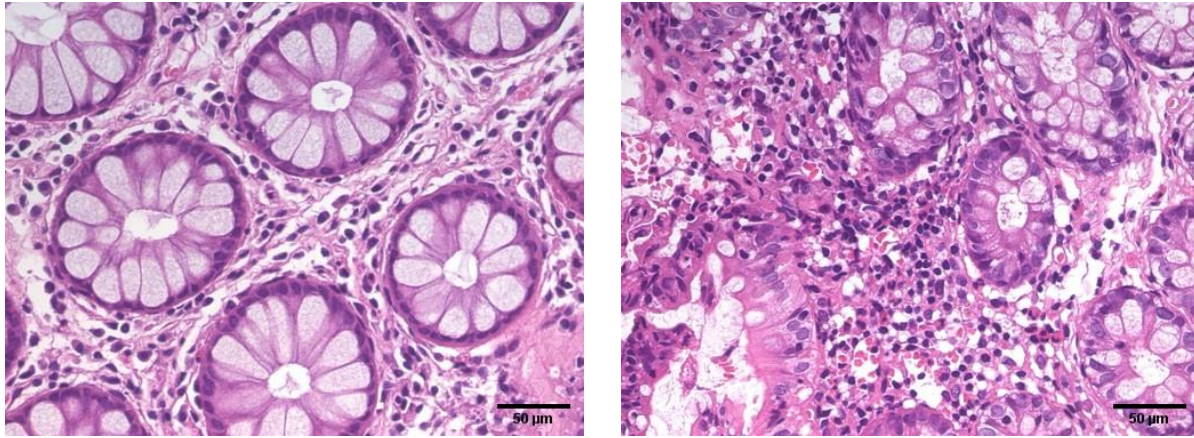

**B**

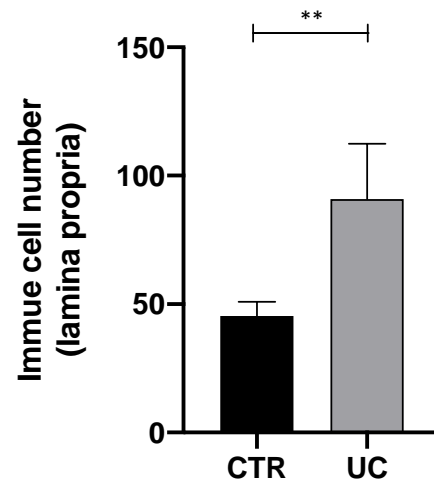

Supplement: f1 [file 6049500.f1.pdf]
